# 1 **Passive sampling of environmental DNA in** 2 **aquatic environments using 3D-printed** 3 **hydroxyapatite samplers** 4

5 Héloïse Verdier <sup>(1,2,3)</sup>, Lara Konecny<sup>(1)</sup>, Christophe Marquette<sup>(4)</sup>, Helen Reveron<sup>(6)</sup>, Solène  
6 Tadier <sup>(6)</sup>, Laurent Grémillard <sup>(6)</sup>, Amélie Barthès<sup>(2)</sup>, Thibault Datry<sup>(3)</sup>, Agnès Bouchez <sup>(5)</sup>, and  
7 Tristan Lefébure <sup>(1)</sup>.

8  
9 <sup>1</sup> Univ Lyon, Université Claude Bernard Lyon 1, CNRS, ENTPE, UMR 5023 LEHNA, F-69622,  
10 Villeurbanne, France

11 <sup>2</sup> Eurofins Hydrobiologie France, Rue Lucien Cuenot, 54521 Maxéville, France

12 <sup>3</sup> INRAE, UR-Riverly, Centre de Lyon-Villeurbanne, 5 rue de la Doua CS70077, 69626  
13 VILLEURBANNE Cedex, France

14 <sup>4</sup> 3d.FAB, Univ Lyon, Université Lyon1, CNRS, INSA, CPE□Lyon, ICBMS, UMR 5246, 43, Bd  
15 du 11 novembre 1918, 69622 Villeurbanne cedex, France

16 <sup>5</sup> INRAE, USMB, UMR CARRETEL, 75bis av. de Corzent, 742000 Thonon les Bains, France

17 <sup>6</sup> Univ Lyon, INSA Lyon, UCBL, CNRS, MATEIS UMR 5510, 69621 Villeurbanne, France

18  
19  
20

21 Corresponding authors :

22

23 Héloïse Verdier, Univ Lyon, Université Claude Bernard Lyon 1, CNRS, ENTPE, UMR 5023  
24 LEHNA, Villeurbanne, France, [heloise.verdier@univ-lyon1.fr](mailto:heloise.verdier@univ-lyon1.fr)

25

26 Tristan Lefébure, Univ Lyon, Université Claude Bernard Lyon 1, CNRS, ENTPE, UMR 5023  
27 LEHNA, Villeurbanne, France, [tristan.lefebure@univ-lyon1.fr](mailto:tristan.lefebure@univ-lyon1.fr)

28

29

30

31

## 32 **Abstract**

- 33 1. The study of environmental DNA released by aquatic organisms in their habitat offers a  
34 fast, non-invasive and sensitive approach to monitor their presence. Common eDNA  
35 sampling methods such as filtration and precipitation are time consuming, require  
36 human intervention and are not applicable to a wide range of habitats such as turbid  
37 waters and poorly-accessible environments. To circumvent these limitations, we  
38 propose to use the binding properties of minerals to create a passive eDNA sampler.
- 39 2. We have designed 3D-printed samplers made of hydroxyapatite (HAp samplers), a  
40 mineral known for its high binding affinity with DNA. The shape and the geometry of the  
41 samplers have been designed to facilitate their handling in laboratory and field. Here  
42 we describe and test the ability of HAp samplers to recover artificial DNA and eDNA.
- 43 3. We show that HAp samplers efficiently recover DNA and are effective even on small  
44 amounts of eDNA (<1 ng). However, we also observed large variations in the amount  
45 of DNA recovered even under controlled conditions.
- 46 4. By better understanding the physico-chemical interactions between DNA and the HAp  
47 sampler surface, one could improve the repeatability of the sampling process and  
48 provide an easy-to-use eDNA sampling tool for aquatic environments.

49

50 **Key-words** : DNA Binding, Environmental DNA, Hydroxyapatite, Passive sampling, 3D-  
51 printing

52

53

54

## 55 **1 | INTRODUCTION**

56 At a time of unprecedented threats on freshwater biodiversity, it is crucial to develop rapid,  
57 accurate and minimally invasive tools to monitor aquatic ecosystems. About a decade ago,  
58 methods based on the sampling of environmental DNA (eDNA) were proposed as a  
59 revolutionary way to survey aquatic macro-organisms (Deiner et al., 2017). Macro-organisms  
60 release DNA in their environment through different processes (e.g. faeces, excretion,  
61 shedding cells, gametes) and this eDNA can take different forms (tissues, cells, organites,  
62 nucleo-proteic complexes, ...). The direct sampling of eDNA coupled with molecular analysis  
63 methods such as NGS (Shokralla et al., 2012) or quantitative polymerase chain reaction  
64 (qPCR) (Langlois et al., 2020) allow the detection and identification of aquatic species while  
65 overcoming organism capture. Although eDNA offers many promising applications, several  
66 methodological challenges remain.

67

68 One of the most challenging aspects of eDNA-based approaches is the sampling method.  
69 eDNA is present in very small quantities and is heterogeneously distributed in aquatic  
70 environments (Goldberg et al., 2016). To maximise its recovery, sampling methods must be  
71 able to concentrate eDNA (Hinlo et al., 2017). Active filtration of a large volume of water is the  
72 most commonly-used method to recover eDNA in aquatic systems. However, filtration has  
73 significant methodological limitations. Firstly, it is a long and tedious process requiring human  
74 intervention, sometimes difficult to carry out in poorly-accessible habitats. Secondly, the  
75 clogging of the filters is a recurrent problem which reduces the volume of water that can be  
76 sampled (Williams, Huyvaert and Piaggio, 2017).

77

78 To limit clogging, filtration membranes with large porosity (greater than 0.45  $\mu\text{m}$ ) are often  
79 used. However, eDNA particles can be present in various forms (intra or extracellular), states  
80 (free or complexed with other particles) and sizes (from  $> 180$  to  $< 0.2\mu\text{m}$  but most abundant  
81 between 0.2 and 10  $\mu\text{m}$ ) (Turner et al., 2014; Moushomi et al., 2019 ; Wilcox et al., 2015). As  
82 filtration is based on particle size sorting, the use of membranes with large porosity will  
83 overlook smaller DNA particles, even though they may be an important source of eDNA  
84 (Moushomi et al., 2019). Finally, given the complex dynamic of eDNA in aquatic environments  
85 (i.e. pulsed emission , transport, retention, degradation), one filtration sample will provide an  
86 instantaneous snapshot which is likely to be poorly integrative of the overall eDNA signals  
87 (Pilliod et al., 2013; Spear et al., 2015).

88

89 Passive eDNA sampling using natural substrates is a promising solution to overcome filtration  
90 challenges. Organisms such as marine sponges (Mariani et al., 2019), molluscs (Der  
91 Sarkissian et al., 2020) and biofilms (Rivera et al., 2021) can trap and accumulate eDNA  
92 particles in water. Minerals can also accumulate and protect DNA from enzymatic degradation  
93 (Alvarez et al., 1998; Levy-Booth et al., 2007). Indeed, a sample of sediment can contain  
94 more eDNA than a water sample (Turner, Uy and Everhart, 2015). Recently, Kirtane and  
95 colleagues (Kirtane, Atkinson and Sassoubre, 2020) have shown that montmorillonite and  
96 coal-based mineral powders can be used as passive eDNA samplers in aquatic  
97 environments. Thanks to good DNA capture and preservation rates (up to 200  $\mu\text{g}$  genomic  
98 DNA / g) (Gardner and Gunsch, 2017), sediments and commercial mineral powders may very  
99 well be more integrative eDNA substrates than filtration methods. Yet, these substrates are  
100 difficult to handle and deploy in the environment, particularly in aquatic systems.

101

102 In this study, as an alternative to filtration, we developed proof of concept 3D-printed passive  
103 eDNA samplers. 3D printing allows control of the shape and composition of an object. The  
104 shape of the samplers were designed with optimised surface/volume -ratio and a shape  
105 easing handling in the field and in the lab. The samplers were made of pure hydroxyapatite  
106 (HAp), a calcium phosphate mineral naturally present in bones and known for its high binding  
107 affinity toward DNA (Okazaki et al., 2001; Brundin et al., 2013). Here we describe the  
108 development of hydroxyapatite samplers (HAp samplers) and test their ability to sample  
109 eDNA in fresh waters. Two prototypes of samplers will be presented: a first test-version, with  
110 which the concept and material will be tested, and a second version which shape and design  
111 have been optimised for eDNA sampling. Using controlled laboratory experiments, our  
112 objectives are to (i) quantify the HAp samplers DNA binding and release capacity, (ii) assess  
113 the range of DNA fragment size sampled, (iii) quantify the repeatability of DNA sampling  
114 across several cycles of use of the HAp samplers, and (iv) evaluate the samplers capacity to  
115 sample eDNA released by organisms in microcosm.

116

## 117 **2 | MATERIALS AND METHODS**

### 118 2.1 | 3D-printed HAp samplers design

#### 119 2.1.1 | Raw material and printing setup

120 A photopolymerizable organic resin (3D Mix, 3DCeram Company, HAP, Bonnac-la-Côte,  
121 France) containing 40-60 % (w/v) of hydroxyapatite powder ( $\text{Ca}_{10}(\text{PO}_4)_6(\text{OH})_2$ , stoichiometric  
122 hydroxyapatite), a synthetic calcium phosphate with Ca/P atomic ratio of 1.67, was the raw  
123 material used to fabricate the samplers. The samplers were built from this hydroxyapatite-

124 enriched resin using a 3D stereolithographic printer (CERAMAKER C900, 3DCeram  
125 Company, with 55mW laser power and 100 $\mu$ m layer thickness).

126 Two types of prototypes of HAp samplers were produced. The first prototype (P1) is a test  
127 version corresponding to 10 pieces cut out of a 3D-printed mesh (Fig. 1a). P1 prototypes  
128 have an exposed surface of 240 mm<sup>2</sup> and a macroporosity of 500  $\mu$ m in diameter. A second  
129 more elaborate prototype (P2) was then produced with optimized geometry and porosity, and  
130 printed in 25 copies (Fig. 1b). P2 has a total surface of 480 mm<sup>2</sup> and a macroporosity of 400  
131  $\mu$ m in diameter.

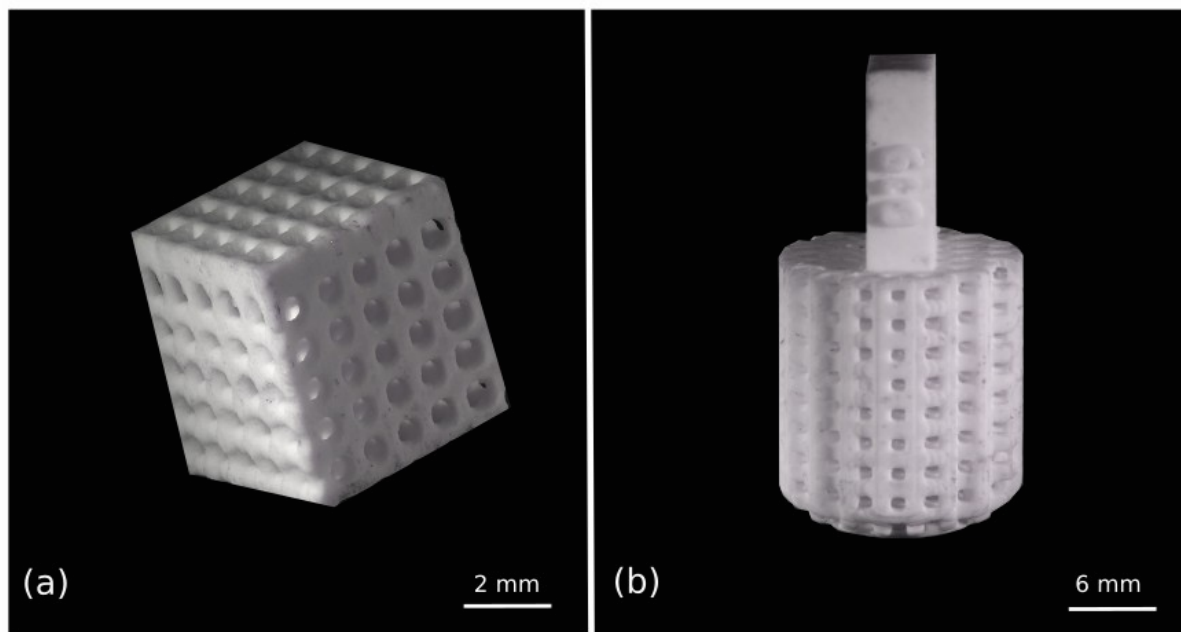

132  
133 **FIGURE 1** : Images of 3D-printed hydroxyapatite samplers prototype P1 (a) and P2 (b)  
134 obtained with a confocal microscope (objective x0.5, LEICA Z16 APO, camera LEICA  
135 DMC5400).

136

137 2.1.2 | Debinding and sintering steps

138 Once printed, cleaned with a specific solvent (Ceracleaner, 3DCeram Company, Bonnac-la-  
139 Côte, France) and dried, the HAp samplers underwent debinding and sintering steps.  
140 Debinding aims at removing all organic components (in particular the organic resin) and was  
141 conducted in a conventional oven following the thermal cycle described in Table 1.

142 **TABLE 1** : Process parameters for debinding HAp samplers

143

| Step | Temperature (°C) | Heating rate<br>(°C/min) | Dwell (min) |
|------|------------------|--------------------------|-------------|
| 1    | 20-200           | 0,2                      | 120         |
| 2    | 200-300          | 0,1                      | 120         |
| 3    | 300-380          | 0,1                      | 120         |
| 4    | 380-550          | 0,1                      | 120         |
| 5    | 550-950          | 1                        | 0           |
| 6    | 950-20           | 2                        | -           |

144

145 Sintering aims at consolidating the samplers by densifying them (creation of necks and  
146 reduction of the porosity between the individual ceramic particles) (Rahaman, 2017), and is  
147 achieved by a thermal treatment at higher temperature (1°C/min up to 1150°C, 60 min. at  
148 1150°C, followed by a second step at 3°C/min up to 1250°C, 60 min at 1250°C, finally cooling  
149 to room temperature at 3°C/min). After sintering, no additional processing (i.e. finishing or  
150 polishing) was performed. The presence of pure HAp was confirmed by X-ray diffraction  
151 (XRD) performed on as-sintered samples.

152

153 2.2 | Expected DNA recovery from HAp samplers

154 We used the term “DNA recovery” to define the quantity of DNA that binds and is released  
155 from the HAp samplers. We estimated the theoretical maximum DNA recovery ( $DN_{max}$ )  
156 based on the hypothesis that a single layer of DNA molecules would bind on the HAp surface  
157 of the samplers. According to equation 1, the number of DNA molecules that can bind to the  
158 surface is obtained by dividing the exposed surface ( $S_e$ ) of a sampler ( $P1 = 240 \text{ mm}^2$ ,  $P2 =$   
159  $480 \text{ mm}^2$ ) by the surface of a DNA base pair ( $S_d = 6.46E-10 \text{ mm}^2$ ). The surface of a DNA  
160 base pair was calculated according to Mandelkern et al (1981) (diameter = 2 nm, length = 3.4  
161 nm). The number of DNA molecules per sampler is then divided by Avogadro's constant ( $N_A =$   
162  $6.02214076 \times 10^{23} \text{ mol}^{-1}$ ) to give the number of DNA moles per sampler. The number of  
163 moles of DNA is then divided by the molar mass of a DNA base pair ( $W = 650 \text{ daltons}$ ) to  
164 obtain the total mass of DNA that can bind to a sampler. Being smaller, P1 has a maximum  
165 theoretical recovery capacity of 400 ng of DNA per sampler, while P2 has a capacity of 800  
166 ng.

$$167 \quad DN_{max} = (S_e / S_d) / N_A \times W \quad \text{Equation 1}$$

168

### 169 2.3 | Protocol of DNA binding and release

170 The HAp sampler DNA binding and release protocol is composed of 5 steps. First, HAp  
171 samplers are decontaminated before each experiment by a thermal treatment in air at  $550^\circ \text{C}$   
172 for 3 hours (Thermolyne model 30400 furnace), a procedure typically used to decontaminate  
173 glassware. Second, DNA is bound to the HAp samplers by immersing them in an aqueous  
174 solution (varying composition upon the present study) containing DNA. Third, samplers are  
175 transferred to Eppendorf tubes and centrifuged for 1 minute at 3000 rpm to dry them. Fourth,  
176 samplers are washed with 1 mL of sterile ultrapure water. Finally, DNA is released from the



177 samplers by immersing them in 1 mL of 0.1 M phosphate buffer pH 8, vortexed for 30  
178 seconds and incubated at room temperature for 1 hour.

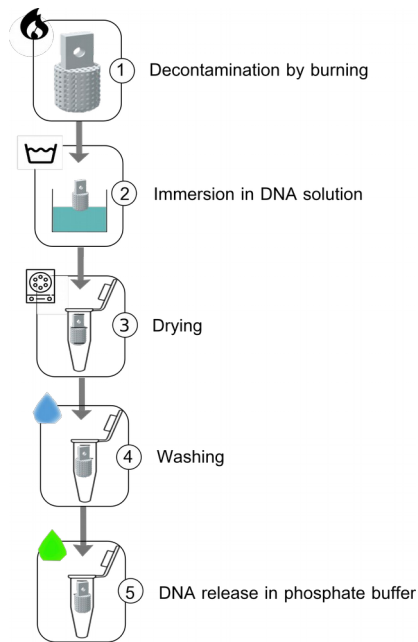

180 **FIGURE 2** : DNA binding and release protocol

181

## 182 2.4 | DNA sampling experiments by HAp samplers

### 183 2.4.1 | Experiment 1: DNA binding and release

184 A DNA sampling experiment with concentrated DNA fragments of various sizes (i.e. a DNA  
185 size marker) was conducted to validate the binding and release protocol and to assess  
186 whether DNA fragments of different sizes have different binding efficiencies. After  
187 decontamination, one batch of HAp samplers (P1 and P2) was incubated in tubes (1 sampler/  
188 tube) containing 2 mL of a solution of large DNA fragments at 5000 ng / mL ( $\lambda$  DNA / BstEII  
189 Digest, 117-8450 bp). A second batch of HAp samplers was incubated in tubes containing 2  
190 mL of a solution of short DNA fragments at 2000 ng / mL (PCR 20 bp Low Ladder, 20-2000  
191 bp). Both batches were incubated for 17 hours on a rotary shaker (IKA Roller 6 Digital, 40

192 rpm). Controls were tubes with 2 mL of solution and devoided of samplers. Residual DNA in  
193 the supernatants was quantified by taking 60  $\mu$ l aliquots of the supernatant after 45 min and  
194 17 h of incubation. After incubation, HAp samplers were removed from the DNA solutions  
195 using sterile clamps and DNA was released according to the protocol in section 2.3. All  
196 supernatants aliquots and released DNA solutions were stored at -20°C prior to analysis.

197

#### 198 2.4.2 | Experiment 2: repeatability

199 A quantification of repeatability was conducted to test whether HAp samplers can be reused  
200 after several cycles of use. A cycle of use is defined here as a thermic treatment phase  
201 followed by a DNA binding and release phase. For this purpose, 5 prototypes 1 and 25  
202 prototypes 2 HAp samplers were incubated in a concentrated solution of DNA size marker  
203 ( $\lambda$ DNA/BstEII Digest 117-8450 pb) at a concentration of 2.8  $\mu$ g/mL on a rotary shaker (Roller  
204 10 Digital IKA) for 17 H. This experiment was carried out three times in a row (hereafter called  
205 experiments A, B and C) under strictly identical conditions, at room temperature (24°C  $\pm$  2°C)  
206 with decontamination through thermic treatment between each use. After incubation, HAp  
207 samplers were removed from the DNA solution with sterile clamp, washed and DNA was  
208 released with 1 mL of 0.1 M phosphate buffer pH 8 according to the protocol section 2.3 DNA  
209 samples were stored at -20°C prior to analysis.

210

#### 211 2.4.3 | Experiment 3: microcosm experiment

212 *Asellus aquaticus*, a small freshwater isopod, was used as a target organism to test the  
213 capacity of the HAp samplers to collect eDNA. 40 organisms of *A.aquaticus* sampled from a  
214 natural pond (Lyon, France) in april 2019 were divided into 8 glass microcosms (5 individuals /  
215 microcosm) containing 500 mL of synthetic water (Peltier and Weber, 1985). Positive controls

216 correspond to microcosms where we injected genomic DNA (final microcosm at 1 ng/mL)  
217 extracted from a pool of 10 *A.aquaticus*. Negative controls were of two types: control  
218 microcosms containing water without DNA and a sampler, and control samplers from which  
219 the DNA was released just after the decontamination step (i.e. without incubation in DNA  
220 solution). After 24 hours of *A. aquaticus* acclimatization, the two prototypes of HAp samplers  
221 were incubated in microcosms (1 sampler / microcosm) for 24 hours. All microcosms were  
222 placed in a cold room at 18°C, spaced 0.5 m apart and covered to limit the risk of  
223 contamination. The organisms were not fed during the experiment to reduce the amount of  
224 allochthonous DNA. After incubation, the HAp samplers were collected with sterile clamps  
225 and the DNA was released according to section 2.3 of the protocol. Released DNA was  
226 purified (Macherey-Nagel <sup>™</sup> NucleoSpin <sup>™</sup> gel and PCR cleaning kit) to avoid potential  
227 inhibition of the downstream qPCR by the phosphate buffer (see next section), following the  
228 manufacturer's recommendations. Purified eDNA was stored at -20 ° C prior to analysis.

24 H acclimatization

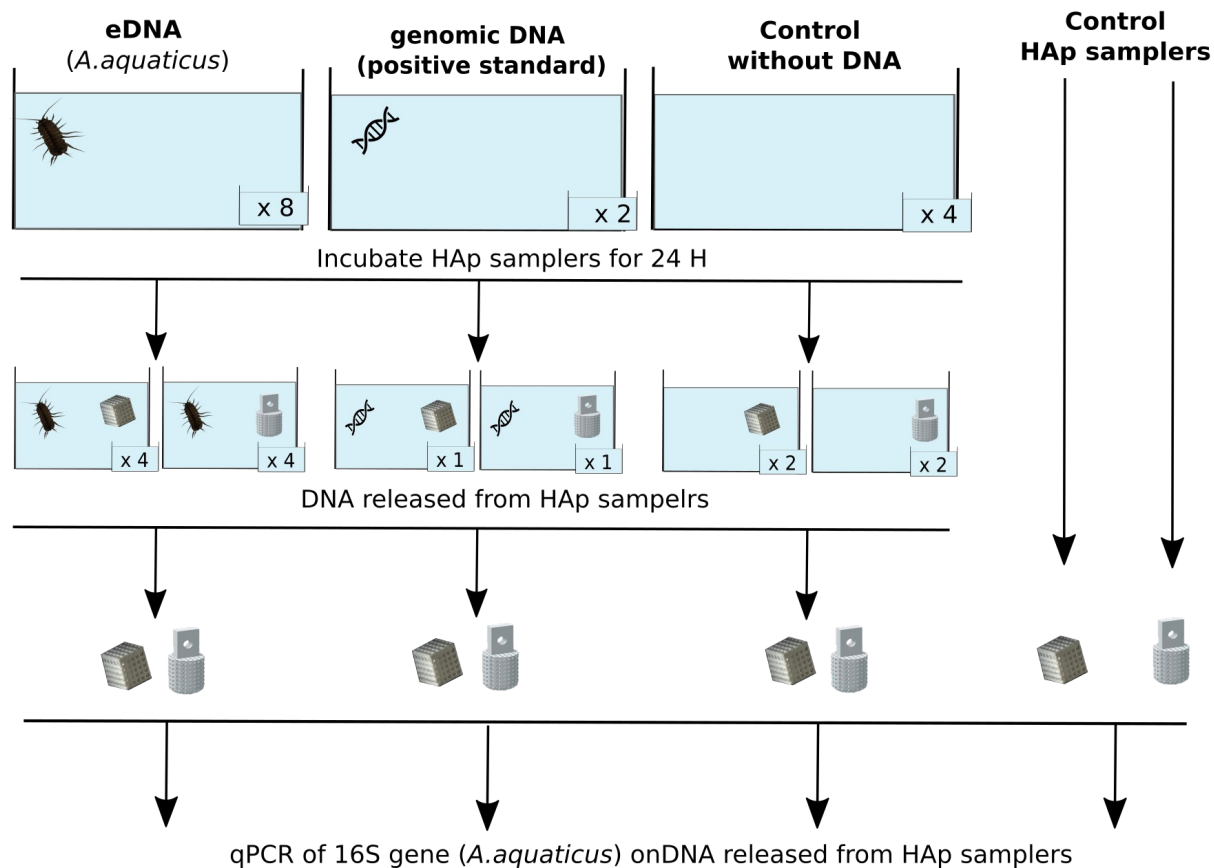

229 qPCR of 16S gene (*A. aquaticus*) on DNA released from HAp samplers

230

231 **FIGURE 3** : Experimental design testing HAp samplers efficacy to recover eDNA from *Asellus*  
232 *aquaticus* in microcosms.

233

234 2.5 | DNA quantification and analysis

235 2.5.1 | Quantification of DNA size marker

236 In the first experiment, DNA binding and release by HAp samplers were evaluated by  
237 following the DNA concentration and fragment sizes in three compartments: (1) in the  
238 supernatant (i.e. residual DNA), (2) in the washing solution, and (3) in the releasing solution  
239 (Fig. 4). DNA was quantified using a QuBit ® 3.0 fluorometer (Invitrogen) with the dsDNA BR  
240 kit (broad range, 2 to 1000 ng/ $\mu$ L) according to the manufacturer's protocol. The binding of

241 large DNA fragments (117-8450 pb) was evaluated using gel electrophoresis (1.3% agarose),  
242 and the binding of small fragments (35-2000 bp) using a 2100 Bioanalyzer with an Agilent  
243 high-sensitivity DNA chip (Agilent Technologies).

244

245 For the second experiment (repeatability), the amount of DNA released from the HAp  
246 samplers was measured by fluorescence (excitation at 480 nm and emission at 520 nm)  
247 using an Infinite M200 Pro microplate fluorometer (TECAN, Switzerland). A QuantiFluor®  
248 dsDNA kit was used according to the manufacturer's protocol, with a DNA sample volume of  
249 10  $\mu$ L and 190  $\mu$ L of working solution. A five-fold dilution series (1500-0 ng/ $\mu$ L) of standard  
250 DNA (Lambda DNA Standard, 100 $\mu$ g/mL) was used to build the standard curve and calculate  
251 the sample DNA concentration in  $\mu$ g/ $\mu$ L. The results are reported in percentage of recovered  
252 DNA (i.e. DNA bound and released).

253  $DNA_r$  is the measured concentration of released DNA ( $\mu$ g/mL) per HAp sampler and  $DNA_{tot}$   
254 is the initial DNA concentration added in each tube ( $DNA_{tot} = 2.8 \mu$ g/mL).

255

### 256 2.5.2 | Quantitative PCR assay for eDNA from *A. aquaticus*

257 For the third experiment (microcosm experiment), quantitative PCR (qPCR) was used to  
258 quantify the amount of *A. aquaticus* eDNA recovered by the samplers. We designed a pair of  
259 primers to specifically amplify a 110 bp fragment of the mitochondrial 16S gene of *A.*  
260 *aquaticus* (5' GGTTTAAATGGCTGCAGTATCC 3', 5' CTTGTGTAATAAAAAGCCTACCTC 3').  
261 The amplification specificity of the primers was tested *in silico* using primer-BLAST (NCBI)  
262 and assessed experimentally through PCR and electrophoresis gel analysis. The qPCR  
263 reaction volume was 20  $\mu$ L consisting of 1X SsoAdvanced Universal SYBR Green Supermix  
264 (Bio-Rad Laboratories Inc., Hercules, CA), 0.5  $\mu$ M of primers and 2  $\mu$ L of DNA released from

265 samplers. All qPCRs assays were run in duplicate in 96 wells plate on a CFX96 Touch™ Real-  
266 Time PCR Detection System (Bio-Rad Laboratories, Inc., Hercules, CA). qPCR cycle started  
267 with an incubation at 95 °C for 10 min followed by 45 cycles of denaturation at 95 °C for 10  
268 sec and an annealing/extension step at 60 °C for 20 sec before a final melt curve from 65-95  
269 °C (0.5 °C increments). Each qPCR plate included a five-fold dilution series of the genomic  
270 DNA at a concentration between 0 and 2.5 ng/μL quantified by a QuBit 3.0 assay.

271

272

273

274

275

276

## 277 2.6 | Statistical analysis

278 Linear mixed-effect models (LMMs) were used to test the influence of the prototype version  
279 and of the experiment timing (experiment 2). These models were fitted with the restricted  
280 maximum likelihood method using the package nlme. We tested significance of experiment  
281 timing and prototype version using likelihood ratio tests (LRT) between the models with and  
282 without the tested variable. All analyses were conducted using R (v 4.0.3).

283

## 284 **3 | Results**

### 285 3.1 | Experiment 1: DNA binding and release

286 We tested the hypothesis that 3D-printed HAp samplers can bind DNA of different fragment  
287 sizes by exposing them to two solutions of DNA size markers containing either long (117 to  
288 8450 bp) or short DNA fragments (35 bp to 2000 bp). In the solution containing long DNA

289 fragments, quantification of DNA concentration (Fig. 4, bottom panel) shows a clear reduction  
290 in DNA concentration in the supernatant after 17 hours of exposure to the HAp samplers for  
291 both sampler replicates. Once immersed in the releasing solution, and after only 1 minute, the  
292 HAp samplers started to release DNA. The amount of released DNA then tripled after 1 hour  
293 of incubation. By examining the DNA band profiles in the supernatants and in the releasing  
294 solution, we found that P1 bound all DNA fragment sizes from 2000 to 8450 bp. Fragments  
295 below 2000 bp were not visible on the electrophoresis gel (Fig. 4, top panel). The same  
296 observations were made on P2 (see supporting information).

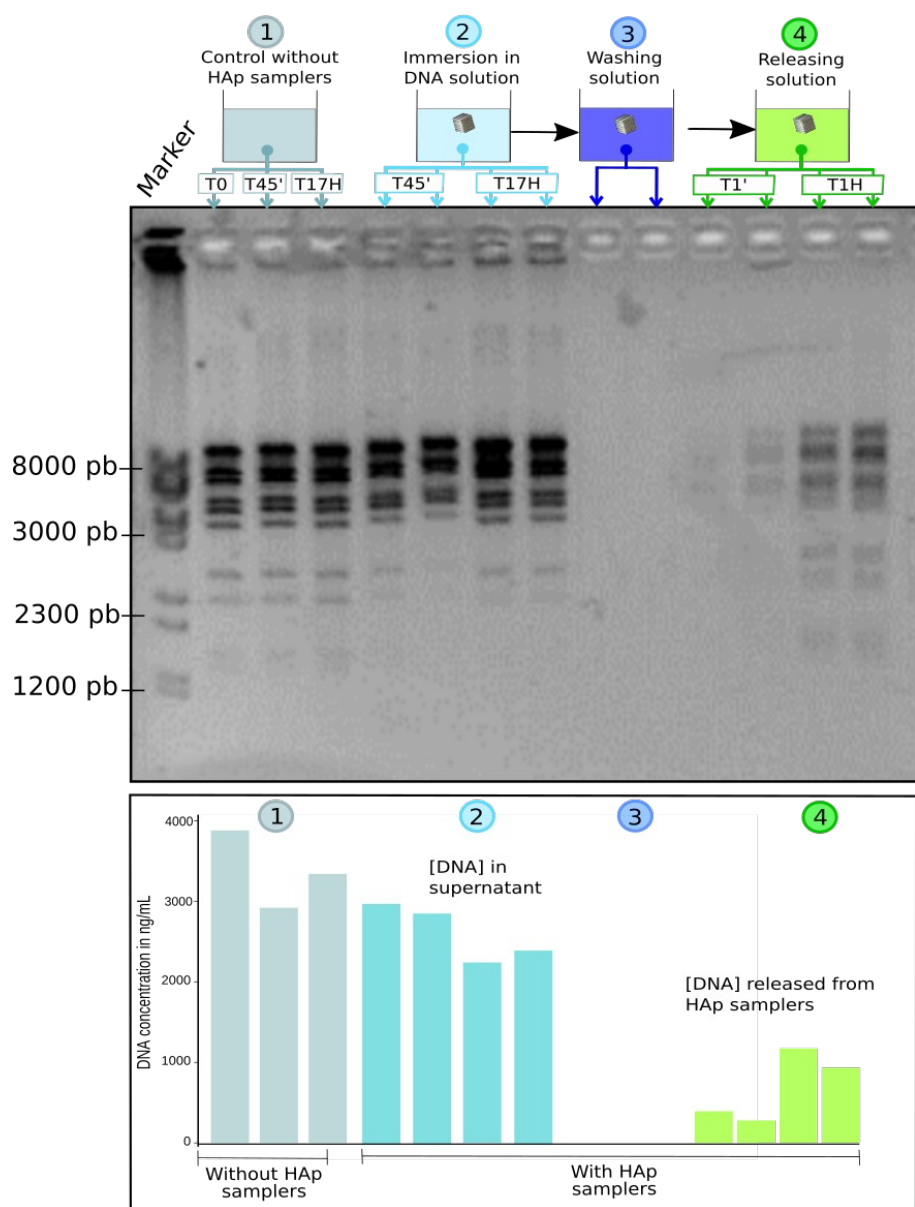

297

298 **FIGURE 4** : DNA binding and release by two replicates of the HAp samplers prototype 1. DNA  
299 fragment size (agarose electrophoresis gel, top panel) and concentration (bottom panel) are  
300 shown in the following order (left to right): 1) in the control solution without HAp samplers after  
301 0 minute, 45 minutes and 17 hours, 2) in the DNA solution 45 min and 17 H after addition of  
302 HAp samplers, 3) in the washing solution and 4) in the releasing solution 1 min and 1 H after  
303 immersion of the HAp samplers.



304

305 Repeating the same experiment but using this time short DNA fragments (35-2000 pb) and a  
306 microfluidics-based automated electrophoresis system does not show an effect of fragment  
307 size on DNA binding (Fig. 5): both samplers prototypes bound and released DNA fragments  
308 ranging from 35 to 2000 bp although the resolution of the marker for fragments above 600 bp  
309 was not optimal.

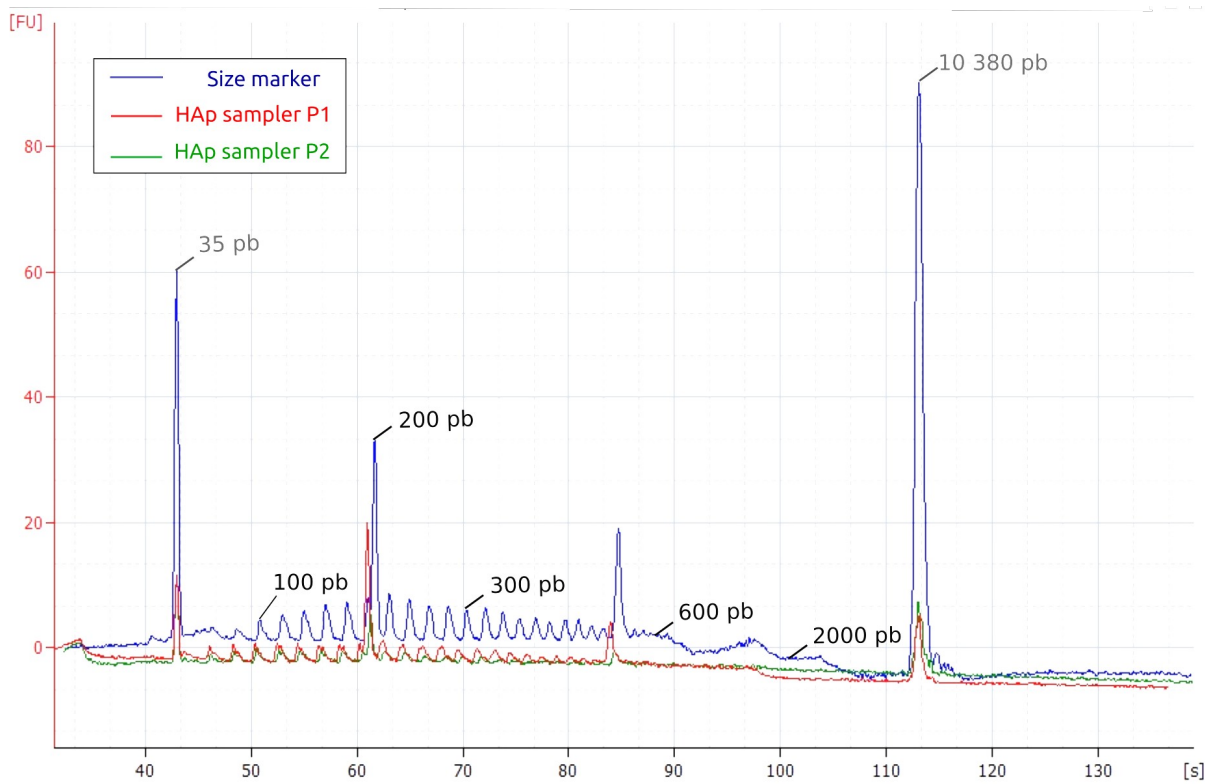

310

311

312 **FIGURE 5** : Electropherograms of the DNA fragments bound and released by the prototype 1  
313 (red curve) and prototype 2 (green curve). As a standard, the blue curve represents the profile  
314 of the initial DNA marker. The horizontal axis represents the migration time of DNA fragments  
315 in seconds, and the vertical axis represents fluorescence. The left-most (35 pb) and right-  
316 most (10380 pb) peaks are internal markers.

### 317 3.2 | Experiment 2: Reusing HAp samplers over time

318 A repeatability experiment was conducted to test the hypothesis that HAp samplers can be  
319 reused and that their binding efficacy is stable after several cycles of use. We performed three  
320 consecutive cycles of use (experiment A, B and C), each composed of a decontamination,  
321 DNA binding and release steps. The percentage of DNA recovered by the samplers was lower  
322 in experiment A compared to experiments B and C, with an average of 8%, 17% and 15%,  
323 respectively (Fig. 6). In the meantime, experiment A showed a disproportion of samplers (18  
324 out of 30, against 0 for experiment B and C) which failed to recover any DNA compared to the  
325 other experiments (Fisher exact test,  $p < 1E-10$ ). After removing the samplers which failed to  
326 capture any DNA, we tested the influence of the experiment and prototype on the percentage  
327 of DNA recovered using a linear mixed-effect models with experiments (A, B and C) and  
328 sampler prototypes (P1 or P2) as the fixed effects, and samplers as random effect on the  
329 intercept. The experiment and the sampler prototype had no significant effect on the  
330 percentage of DNA recovered (LRT, sampler prototype :  $\chi^2_{df=1}=4.96, p=0.08$ , experiment :  
331  $\chi^2_{df=2}=1.16, p=0.28$ ). Nonetheless, while not associated with any experiment in particular, the  
332 percentage of DNA recovered was highly variable. The coefficient of variation of DNA  
333 recovered was on average 65% considering all the samplers and 34% when excluding the  
334 samplers which failed to recover any DNA. Altogether, while we found that the samplers can  
335 still recover DNA after several cycles of use, we also discovered that the capacity of HAp  
336 samplers to recover DNA is variable and unpredictable: at some times it may not work at all,  
337 while at others it may recover a large amount of DNA.

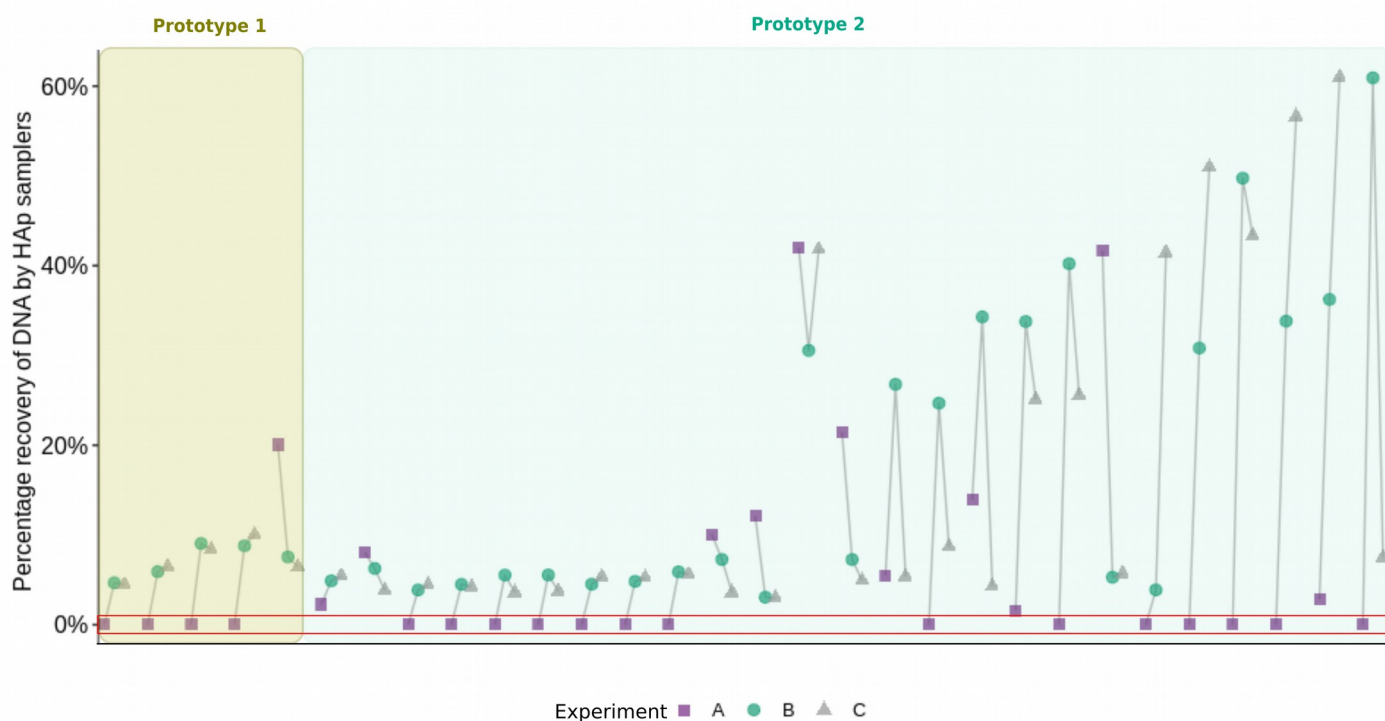

339 **FIGURE 6** : Percentage of DNA recovered by two prototypes (P1 and P2) of HAp samplers in  
340 three consecutive experiments (A, B and C). 5 P1 and 25 P2 samplers are sorted according  
341 to their variance of recovered DNA. Samplers in the red box did not recover any DNA.

342

### 343 3.3 | Experiment 3: Environmental DNA sampling

344 We deployed the HAp samplers in a microcosm containing isopods (*Asellus aquaticus*) to test  
345 their ability to recover eDNA and used qPCR to quantify the amount of *A. aquaticus* 16S gene  
346 recovered by the samplers. In a microcosm with no organisms, we observed low levels of  
347 DNA that were similar or slightly above the amount of DNA observed in control samplers that  
348 were not immersed in a microcosm (Fig. 7). This is indicative of a slight level of cross-  
349 contamination between microcosms, and allowed us to determine an amount of 16S DNA  
350 below which we cannot differentiate between a contamination and a positive result (limit of

351 blank, LOB). As expected, using concentrated genomic DNA as a positive control, the  
352 samplers recovered large amounts of 16S DNA molecules (Fig. 7). In the microcosm that  
353 contained isopods, the amount of 16S DNA molecules was about 3 orders of magnitude  
354 lower, with 3 samplers out of 8 below the limit of blank. Overall, the two HAp prototypes  
355 recovered *A. aquaticus* eDNA with the same efficiency (Wilcox-test,  $p = 0.89$ ).

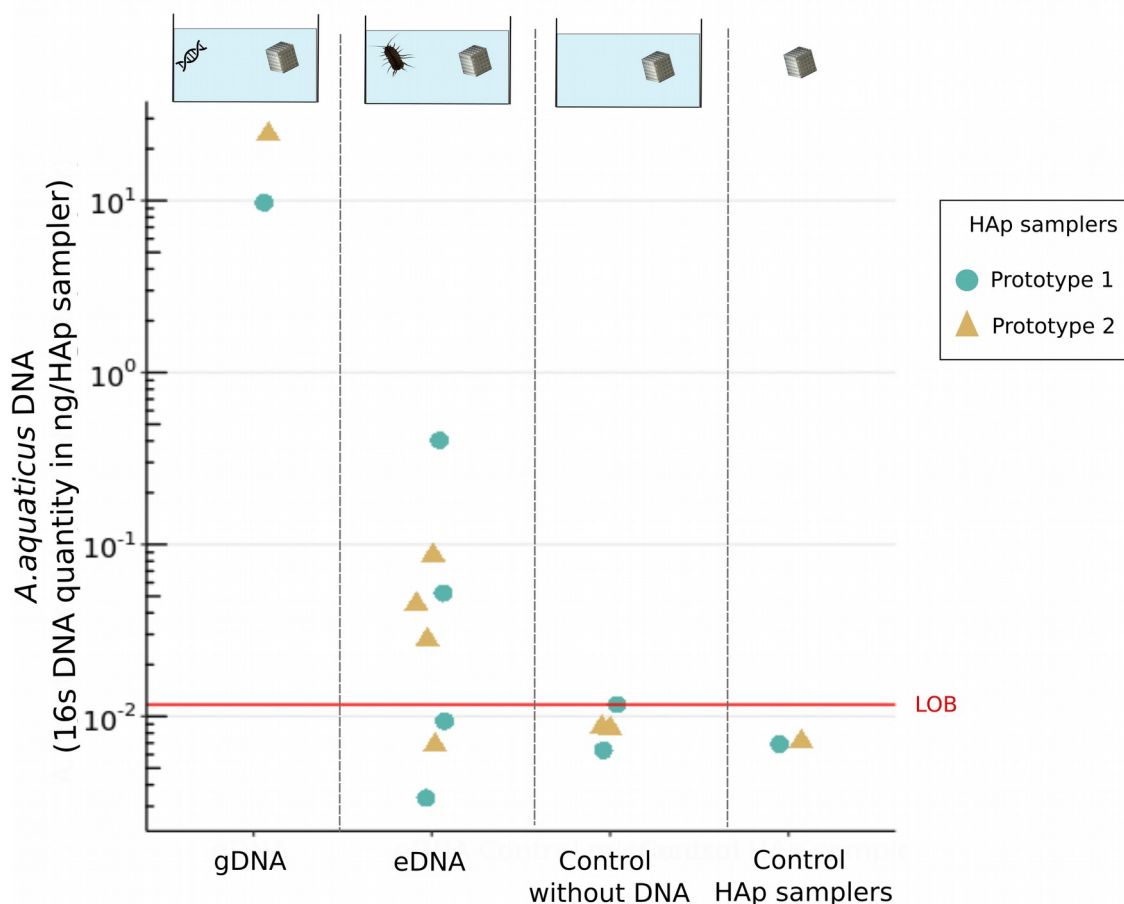

357

358 **FIGURE 7** : Quantity (in log scale) of *A.aquaticus* 16S gene recovered by the two prototypes  
359 of HAp samplers (P1 = circle, P2 = triangle) after 24h of incubation in microcosm containing  
360 genomic DNA used as a positive control (gDNA) or five individuals of *A. Aquaticus* (eDNA).

361 Two types of negative controls were used: one control microcosm without DNA (control  
362 without DNA), and HAp samplers without microcosm incubation (control HAp samplers). Red  
363 line corresponds to the limit of blanks (LOB).

364

## 365 **4 | Discussion**

### 366 4.1 | HAp samplers recover artificial DNA and eDNA

367 Our results demonstrated that HAp samplers can passively recover artificial DNA and eDNA.  
368 Using artificial DNA, DNA recovery was fast and optimal. In 17 hours, HAp samplers  
369 recovered up to 4 times more DNA (i.e. 1.75 µg) than the theoretical quantity we had  
370 estimated using a projection of a DNA monolayer on the surface of the samplers (see  
371 methods). These results confirm the high binding affinity between DNA and hydroxyapatite  
372 reported in literature (Okazaki et al., 2001 ; Del Valle et al., 2014) and suggest that more than  
373 one layer of DNA molecules can bind to the HAp surface. To our knowledge, this is the first  
374 time that these binding properties are tested and validated on 3D-printed objects. eDNA  
375 experiments showed that HAp samplers recovered eDNA from living macro-organisms (*A.*  
376 *aquaticus*). 5 out of 8 HAp samplers allowed a positive detection of *A. aquaticus* after only 24  
377 hours of incubation in microcosm. Given the low densities of these small isopods which,  
378 unlike large organisms commonly used in eDNA microcosm experiments (e.g. fish,  
379 amphibians; Maruyama et al., 2014; Jo et al., 2020), are likely to release very small amounts  
380 of eDNA, and given the short experiment duration, this overall high rate of detection  
381 demonstrates the high sensitivity of HAp samplers to detect organisms.

382

383

384

#### 385 4.2 | Binding of different DNA fragment size

386 While it was hypothesized that DNA fragment size would influence DNA binding (Ogram et al.,  
387 1994), we did not find any evidence that certain fragment sizes bind preferentially to the HAp  
388 samplers. The samplers recovered DNA fragments of various sizes (i.e. 35-8450 bp),  
389 although bands below 2000 bp were not visible on the electrophoresis gel, possibly due to a  
390 higher concentration of the larger fragments in the marker solution. However, the sensitive  
391 microfluidics-based automated electrophoresis analysis showed that smaller fragments  
392 (<2000 bp) were bound and released by HAp samplers. eDNA is a complex mixture of genetic  
393 material ranging from cells to more or less degraded free DNA fragments (Wilcox et al.,  
394 2015). A sampling method that is not biased toward a given range of fragment sizes is a real  
395 advantage for eDNA sampling, in particular in environments where eDNA could be rapidly  
396 degraded into small free DNA fragments (Seymour et al., 2018). While free DNA binds to the  
397 HAp samplers, it remains to be tested whether other forms of eDNA such as proteo-nucleic  
398 complexes or even larger particles can also be collected.

399

#### 400 4.3 | Repeatability issues

401 Although HAp samplers show a great potential for DNA sampling, repeatability appears to be  
402 a concerning issue. Many HAp samplers showed extreme variability in DNA recovery among  
403 experiments carried out under strictly identical conditions (section 3.2). Given the high  
404 number of samplers that did not recover any DNA during the first but not the later experiments  
405 (Fig. 6), one might have expected that DNA recovery would improve with cycle of use.  
406 However, no effect of cycle of use or sampler prototype was found. In some cases, the DNA  
407 recovery remained stable over time, in some it increased, and in other it decreased.  
408 Surprisingly, while highly variable, there was not a set of samplers or one prototype in

409 particular which was less effective than the others to recover DNA. This unexplained  
410 variability highlights the complexity of the binding mechanism between DNA and  
411 hydroxyapatite and the factor that controls it, and reinforces the necessity to better  
412 understand the evolution of the HAp surface after several DNA cycles of use. According to  
413 Okazaki et al. (2001), the binding affinity is based on an electrostatic interaction between the  
414 negative charges of the phosphate groups of DNA to the calcium ions at the surface of the  
415 hydroxyapatite. This ionic interaction strongly depends on the physico-chemical properties of  
416 the sampler surface and the solution in which the binding reaction takes place (Gallo et al.,  
417 2018). Among the surface properties, porosity, specific surface area, crystallinity and  
418 stoichiometry of the HAp phase (calcium groups can be substituted by other ions) could play  
419 a major role in DNA binding. The different manufacturing steps, such as the HAp densification  
420 (i.e. sintering), can greatly influence most of these surface properties. In particular, ionic  
421 substitution (e.g. carbonatation) and partial dehydration are known to occur frequently in HAp  
422 during thermal treatment (Wang, Dorner-Reisel and Müller, 2004; Lafon, 2004) such as the  
423 ones used here to decontaminate the samplers before and between experiments, and might  
424 be the source of the observed variability. Surface analyse needs to be carried out to identify  
425 the physical (e.g. porosity, crystalline phases) and chemical (e.g. surface ionic groups)  
426 parameters involved in DNA binding on the HAp surface and the extent to which these  
427 parameters are influenced by the manufacturing and use of the sampler (e.g. sintering,  
428 debinding, immersion in DNA solution).

429

430

431

432

## 433 **5 | CONCLUSION**

434 In view of the democratisation of the use of eDNA, tools are needed to easily and cost-  
435 effectively sample eDNA. We demonstrate that 3D passive hydroxyapatite samplers can be  
436 designed and used to collect eDNA, albeit some repeatability issues. Provided we can get a  
437 better understanding and control of the interaction between eDNA and HAp, this approach  
438 offers an alternative sampling solution for eDNA-based biomonitoring. It also opens up an  
439 interdisciplinary field at the interface between engineering, surface science and molecular  
440 ecology.

441

## 442 **ACKNOWLEDGEMENTS**

443 This work was supported by the CNRS Mission pour les Initiatives Transverses et  
444 Interdisciplinaires (project XLIFE CAPTAS), the French Biodiversity Agency (OFB), the  
445 National Technology Research Association (ANRT) and the company Eurofins Hydrobiologie  
446 France. This work was realised thanks to the support of the Graduate School H<sub>2</sub>O'Lyon (ANR-  
447 17-EURE-0018) and Université de Lyon (UdL) as part of the programme "Investissements  
448 d'Avenir" run by Agence Nationale de la Recherche (ANR). We acknowledge Louise Camus  
449 for her help with the microcosm experiment, Valentin Vasselon for his advice on experiments  
450 with artificial DNA and Jalal Omarakly for the surface analysis of the samplers.

## 451 **AUTHORS' CONTRIBUTIONS**

452 TL and CM conceived the ideas and designed HAp samplers. Experimental design was  
453 conceived by TL, LK and HV. HAp samples were thermal treated and characterized by HR,  
454 ST and LG. Laboratory experiments were conducted by HV and LK. Data analysis was  
455 conducted by HV and TL. HV and TL led the writing of the manuscript. All authors contributed  
456 to the manuscript.



## 457 REFERENCES

- 458 Alvarez, A. J. *et al.* (1998) 'Amplification of DNA bound on clay minerals', *Molecular*  
459 *Ecology*, 7(6), pp. 775–778. doi: 10.1046/j.1365-294x.1998.00339.x.
- 460 Brundin, M. *et al.* (2013) 'DNA Binding to Hydroxyapatite: A Potential Mechanism for  
461 Preservation of Microbial DNA', *Journal of Endodontics*, 39(2), pp. 211–216. doi:  
462 10.1016/j.joen.2012.09.013.
- 463 Deiner, K. *et al.* (2017) 'Environmental DNA metabarcoding: Transforming how we survey  
464 animal and plant communities', *Molecular Ecology*, 26(21), pp. 5872–5895. doi:  
465 10.1111/mec.14350.
- 466 Del Valle, L. J. *et al.* (2014) 'DNA adsorbed on hydroxyapatite surfaces', *J. Mater.Chem. B*,  
467 2(40), pp. 6953–6966. doi: 10.1039/C4TB01184H.
- 468 Der Sarkissian, C. *et al.* (2020) 'Unveiling the Ecological Applications of Ancient DNA From  
469 Mollusk Shells', *Frontiers in Ecology and Evolution*, 8, p. 37. doi:  
470 10.3389/fevo.2020.00037.
- 471 Gallo, M. *et al.* (2018) 'Resorption of calcium phosphate materials: Considerations on the  
472 in vitro evaluation', *Journal of the European Ceramic Society*, 38(3), pp. 899–914.  
473 doi: 10.1016/j.jeurceramsoc.2017.07.004.
- 474 Gardner, C. M. and Gunsch, C. K. (2017) 'Adsorption capacity of multiple DNA sources to  
475 clay minerals and environmental soil matrices less than previously estimated',  
476 *Chemosphere*, 175, pp. 45–51. doi: 10.1016/j.chemosphere.2017.02.030.
- 477 Goldberg, C. S. *et al.* (2016) 'Critical considerations for the application of environmental DNA  
478 methods to detect aquatic species', *Methods in Ecology and Evolution*. Edited by  
479 M. Gilbert, 7(11), pp. 1299–1307. doi: 10.1111/2041-210X.12595.
- 480 Hinlo, R. *et al.* (2017) 'Methods to maximise recovery of environmental DNA from water  
481 samples', *PLOS ONE*. Edited by H. Doi, 12(6), p. e0179251. doi:  
482 10.1371/journal.pone.0179251.
- 483 Jo, T. *et al.* (2020) 'Estimating shedding and decay rates of environmental nuclear DNA with  
484 relation to water temperature and biomass', *Environmental DNA*, 2(2), pp. 140–151.  
485 doi: 10.1002/edn3.51.
- 486 Kirtane, A., Atkinson, J. D. and Sassoubre, L. (2020) 'Design and Validation of Passive  
487 Environmental DNA Samplers Using Granular Activated Carbon and Montmorillonite  
488 Clay', *Environmental Science & Technology*, 54(19), pp. 11961–11970. doi:  
489 10.1021/acs.est.0c01863.
- 490 Lafon, J.-P. (2004) Synthèse, stabilité thermique et frittage d'hydroxyapatites carbonatées  
491 (pp. 218).
- 492 Langlois, V. S. *et al.* (2020) 'The need for robust qPCR-based eDNA detection assays in  
493 environmental monitoring and species inventories', *Environmental DNA*, p. edn3.164.  
494 doi: 10.1002/edn3.164.
- 495 Levy-Booth, D. J. *et al.* (2007) 'Cycling of extracellular DNA in the soil environment', *Soil*  
496 *Biology and Biochemistry*, 39(12), pp. 2977–2991. doi: 10.1016/j.soilbio.2007.06.020.
- 497 Mandelkern, M., Elias, J. G., Eden, D., & Crothers, D. M. (1981). The dimensions of DNA in  
498 solution. *Journal of molecular biology*, 152(1), 153-161. doi: 10.1016/0022-  
499 2836(81)90099-1.
- 500 Mariani, S. *et al.* (2019) 'Sponges as natural environmental DNA samplers', *Current*  
501 *Biology*, 29(11), pp. R401–R402. doi: 10.1016/j.cub.2019.04.031.
- 502 Maruyama, A. *et al.* (2014) 'The Release Rate of Environmental DNA from Juvenile and Adult

- 503 Fish', *PLoS ONE*. Edited by M. Stöck, 9(12), p. e114639. Doi:  
504 10.1371/journal.pone.0114639.
- 505 Moushomi, R. *et al.* (2019) 'Environmental DNA size sorting and degradation experiment  
506 indicates the state of *Daphnia magna* mitochondrial and nuclear eDNA is subcellular',  
507 *Scientific Reports*, 9(1), p. 12500. doi: 10.1038/s41598-019-48984-7.
- 508 Ogram, A. V. *et al.* (1994) 'Effects of DNA Polymer Length on Its Adsorption to Soils',  
509 *Applied and Environmental Microbiology*, 60(2), pp. 393–396. doi:  
510 10.1128/AEM.60.2.393-396.1994.
- 511 Okazaki, M. *et al.* (2001) 'Affinity binding phenomena of DNA onto apatite crystals',  
512 *Biomaterials*, vol. 22, no 18, (pp. 2459-2464). doi : 10.1016/S0142-  
513 9612(00)00433-6
- 514 Pilliod, D. S. *et al.* (2013) 'Estimating occupancy and abundance of stream amphibians  
515 using environmental DNA from filtered water samples', *Canadian Journal of Fisheries*  
516 *and Aquatic Sciences*. Edited by J. Richardson, 70(8), pp. 1123–1130. doi:  
517 10.1139/cjfas-2013-0047.
- 518 Rahaman, M. N. (2017). *Ceramic processing and sintering* (Vol. 1). CRC press.
- 519 Rivera, S. F. *et al.* (2021) 'Exploring the capacity of aquatic biofilms to act as  
520 environmental DNA samplers: Test on macroinvertebrate communities in rivers',  
521 *Science of The Total Environment*, 763, p. 144208. doi:  
522 10.1016/j.scitotenv.2020.144208.
- 523 Seymour, M. *et al.* (2018) 'Acidity promotes degradation of multi-species environmental DNA  
524 in lotic mesocosms', *Communications Biology*, 1(1), p. 4. doi: 10.1038/s42003-017  
525 0005-3.
- 526 Shokralla, S. *et al.* (2012) 'Next-generation sequencing technologies for environmental DNA  
527 research: NEXT-GENERATION SEQUENCING FOR ENVIRONMENTAL DNA'  
528 *Molecular Ecology*, 21(8), pp. 1794–1805. doi: 10.1111/j.1365-294X.2012.05538.x.
- 529 Spear, S. F. *et al.* (2015) 'Using environmental DNA methods to improve detectability in a  
530 hellbender (*Cryptobranchus alleganiensis*) monitoring program', *Biological*  
531 *Conservation*, 183, pp. 38–45. doi: 10.1016/j.biocon.2014.11.016.
- 532 Turner, C. R. *et al.* (2014) 'Particle size distribution and optimal capture of aqueous  
533 microbial eDNA', *Methods in Ecology and Evolution*. Edited by M. Gilbert, 5(7), pp.  
534 676–684. doi: 10.1111/2041-210X.12206.
- 535 Turner, C. R., Uy, K. L. and Everhart, R. C. (2015) 'Fish environmental DNA is more  
536 concentrated in aquatic sediments than surface water', *Biological Conservation*, 183,  
537 pp. 93–102. doi: 10.1016/j.biocon.2014.11.017.
- 538 Wang, T., Dorner-Reisel, A. and Müller, E. (2004) 'Thermogravimetric and thermokinetic  
539 investigation of the dehydroxylation of a hydroxyapatite powder', *Journal of the*  
540 *European Ceramic Society*, 24(4), pp. 693–698. doi: 10.1016/S0955-2  
541 219(03)00248-6.
- 542 Wilcox, T. M. *et al.* (2015) 'Environmental DNA particle size distribution from Brook Trout  
543 (*Salvelinus fontinalis*)', *Conservation Genetics Resources*, 7(3), pp. 639–641. doi:  
544 10.1007/s12686-015-0465-z.
- 545 Williams, K. E., Huyvaert, K. P. and Piaggio, A. J. (2017) 'Clearing muddied waters:  
546 Capture of environmental DNA from turbid waters', *PLOS ONE*. Edited by H. Doi,  
547 12(7), p. e0179282. doi: 10.1371/journal.pone.0179282.
